# Supplementary material
Source: publisher site journal article supplement (https://www.kjim.org/upload/media/kjim-2019-292-suppl5.pdf)
Supplement: Supplementary file 1 [file kjim-2019-292-suppl5.pdf]

**Supplementary Table 4. Risk factors for poor medical compliance (1-year MPR < 95%) for mycophenolic acid**

| Variable                     | Univariable      |         | Multivariable-backward elimination |         |
|------------------------------|------------------|---------|------------------------------------|---------|
|                              | OR (95% CI)      | p value | Adjusted OR (95% CI)               | p value |
| Age, yr                      |                  |         |                                    |         |
| < 30                         | Reference        |         |                                    |         |
| ≥ 30 and < 60                | 1.64 (1.41–1.90) | < 0.001 | 1.57 (1.35–1.82)                   | < 0.001 |
| > 60                         | 1.39 (1.21–1.59) | < 0.001 | 1.46 (1.27–1.68)                   | < 0.001 |
| Male sex (vs. female sex)    | 0.84 (0.76–0.92) | < 0.001 | 0.84 (0.76–1.93)                   | < 0.001 |
| Previous dialysis            |                  |         |                                    |         |
| Pre-emptive                  | Reference        |         |                                    |         |
| Hemodialysis                 | 0.94 (0.81–1.09) | 0.43    |                                    |         |
| Peritoneal dialysis          | 1.10 (0.98–1.23) | 0.11    |                                    |         |
| Both or other                | 0.97 (0.74–1.27) | 0.81    |                                    |         |
| Hypertension (vs. none)      | 0.72 (0.62–0.85) | < 0.001 | 0.80 (0.68–0.94)                   | 0.008   |
| Diabetes mellitus (vs. none) | 1.01 (0.91–1.12) | 0.84    | 1.11 (0.99–1.24)                   | 0.07    |
| Era                          |                  |         |                                    |         |
| 2006–2008                    | Reference        |         | Reference                          |         |
| 2009–2011                    | 0.71 (0.63–0.80) | < 0.001 | 0.73 (0.65–0.83)                   | < 0.001 |
| 2012–2013                    | 0.62 (0.55–0.70) | < 0.001 | 0.62 (0.55–0.71)                   | < 0.001 |

MPR, medication possession ratio; OR, odds ratio; CI, confidence interval.
